# Supplementary material
Source: PubMed Central journal article supplement (PMC5240033)
Supplement: ncomms6973-s1.pdf [file ncomms6973-s1.pdf]

# Supplementary Information

**Supplementary Table 1: Mutations observed in treatment refractory patient:**

| CHROM | POS       | REF | ALT | Gene              | exon          | hgvs                            | class    |
|-------|-----------|-----|-----|-------------------|---------------|---------------------------------|----------|
| 1     | 70555500  | A   | G   | LRRC7             | Ex23of25      | c.4429A>Gp.Lys1477Glu           | NSC      |
| 2     | 44051563  | T   | C   | ABCG5             | Ex8of13       | c.913A>Gp.Thr305Ala             | NSC      |
| 2     | 111399042 | C   | A   | BUB1              | Int21/22      | c.2626-1G>T                     | ESS      |
| 3     | 175165091 | A   | G   | NAALADL2          | Ex6of14       | c.1165A>Gp.Lys389Glu            | NSC      |
| 5     | 66461444  | C   | A   | MAST4             | Ex29of29      | c.6437C>Ap.Pro2146Gln           | NSC      |
| 7     | 100683053 | A   | G   | MUC17             | Ex3of13       | c.8356A>Gp.Thr2786Ala           | NSC      |
| 7     | 100683036 | T   | C   | MUC17             | Ex3of13       | c.8339T>Cp.Ile2780Thr           | NSC      |
| 7     | 152373159 | A   | C   | XRCC2             | Ex1of3        | c.6T>Gp.Cys2Trp                 | NSC      |
| 7     | 100349919 | T   | C   | ZAN               | Ex13of46      | c.2191T>Cp.Ser731Pro            | NSC      |
| 11    | 71946892  | C   | A   | INPPL1            | Ex25of28      | c.2741C>Ap.Ser914X              | SG       |
| 12    | 11461675  | C   | G   | PRB4              | Ex3of4        | c.242G>Cp.Arg81Pro              | NSC      |
| 15    | 41192690  | C   | A   | VPS18             | Ex4of5        | c.1674C>Ap.Tyr558X              | SG       |
| 18    | 23731828  | C   | A   | PSMA8             | Ex3of7        | c.254C>Ap.Thr85Asn              | NSC      |
| 19    | 17392967  | G   | T   | ANKLE1            | Ex2of9        | c.164G>Tp.Gly55Val              | NSC      |
| 19    | 4429600   | C   | A   | CHAF1A            | Ex9of15       | c.1770C>Ap.Asp590Glu            | NSC      |
| 19    | 18547504  | C   | G   | ISYNA1            | Ex5of11       | c.599G>Cp.Arg200Pro             | NSC      |
| 19    | 44352666  | G   | A   | ZNF283            | Ex7of7        | c.1913G>Ap.Cys638Tyr            | NSC      |
| 19    | 56663216  | A   | G   | ZNF444:AC024580.1 | Int3/4:Ex1of2 | c.297+4639A>G:c.35T>Cp.Val12Ala | INTR:NSC |

### **Supplementary Table 2 – Mutated pathways**

2A) Mutated pathways ordered by frequency of observed mutations. Fields as calculated by IntoGen, see URL <http://www.intogen.org/> for documentation

| ♦ pathway                    | ▼ ♦ fm-bias | ▼ ♦ found/studied |
|------------------------------|-------------|-------------------|
| ♥ Metabolic pathways         | 0.027       | 38 / 42           |
| ♥ Pathways in cancer         | 0.334       | 22 / 42           |
| ♥ Endocytosis                | 0.894       | 22 / 42           |
| ♥ PI3K-Akt signaling pathway | 0.013       | 22 / 42           |

2B) Mutated pathways ordered by significance (fm-bias). Fields as calculated by IntoGen, see URL <http://www.intogen.org/> for documentation

| ♦ pathway                    | ▼ ♦ fm-bias | ▼ ♦ found/studied |
|------------------------------|-------------|-------------------|
| ♥ RNA degradation            | 3.815E-3    | 6 / 42            |
| ♥ Acute myeloid leukemia     | 0.013       | 9 / 42            |
| ♥ PI3K-Akt signaling pathway | 0.013       | 22 / 42           |

### **Supplementary Table 3 – Primer sequences used for validation of known driver mutations in *KIT* and *KRAS***

| Gene_Exon_Direction | Primer sequence (5' to 3') |
|---------------------|----------------------------|
| KIT_Ex10-11_F       | ATGGGCTGTGAGTTGGGAG        |
| KIT_Ex10-11_R       | TCAGGTGGAACAAAACAAAGG      |
| KIT_Ex17_F          | TGTGAACATCATTCAAGGCG       |
| KIT_Ex17_R          | AAATGTGTGATATCCCTAGACAGG   |
| KRAS_Ex2_F          | TTTGTATTAAGGTACTGGTGGAG    |
| KRAS_Ex2_R          | TGAAACCCAAGGTACATTCAG      |
